# Supplementary material for: Beneficial Effect of a Selective Adenosine A2A Receptor Antagonist in the APPswe/PS1dE9 Mouse Model of Alzheimer’s Disease
Source: Front Mol Neurosci. 2018 Jul 12;11:235. doi: 10.3389/fnmol.2018.00235 (PMC6052540; doi:10.3389/fnmol.2018.00235)
Supplement: Supplementary file 1 [file Table_1.XLSX]

## Sheet: Flags_Cortex_APP-Water_vs_WT-Wa
Supplementary Table 1 : list of significatively deregulated probes between APP/PS1 H2O vs WT H2O in Cortex
moderated t-test, Benjamini Hochberg correction, adjusted p-values ≤ 0.05, Fold Change >= 1.5
ProbeName	FC Cortex APP/PS1 H20 vs WT H2O	GeneSymbol	Description
A_51_P137419	109.177	Cst7	Mus musculus cystatin F (leukocystatin) (Cst7), mRNA [NM_009977]
A_51_P246653	62.1009	Clec7a	Mus musculus C-type lectin domain family 7, member a (Clec7a), mRNA [NM_020008]
A_51_P303424	56.011	Itgax	Mus musculus integrin alpha X (Itgax), mRNA [NM_021334]
A_51_P140710	42.6918	Ccl3	Mus musculus chemokine (C-C motif) ligand 3 (Ccl3), mRNA [NM_011337]
A_51_P509573	28.4169	Ccl4	Mus musculus chemokine (C-C motif) ligand 4 (Ccl4), mRNA [NM_013652]
A_55_P2016462	26.7134	Cxcl10	Mus musculus chemokine (C-X-C motif) ligand 10 (Cxcl10), mRNA [NM_021274]
A_55_P2744077	25.2002	Ccl4	Mus musculus chemokine (C-C motif) ligand 4 (Ccl4), mRNA [NM_013652]
A_55_P1957459	16.0307	Lilrb4	Mus musculus leukocyte immunoglobulin-like receptor, subfamily B, member 4 (Lilrb4), transcript variant 2, mRNA [NM_001291894]
A_51_P460954	13.1348	Ccl6	Mus musculus chemokine (C-C motif) ligand 6 (Ccl6), mRNA [NM_009139]
A_52_P90363	12.1188	Ifi27l2a	Mus musculus interferon, alpha-inducible protein 27 like 2A (Ifi27l2a), transcript variant 1, mRNA [NM_029803]
A_51_P488739	11.677	Hcar2	Mus musculus hydroxycarboxylic acid receptor 2 (Hcar2), mRNA [NM_030701]
A_66_P117032	9.19952	C4b	Mus musculus complement component 4B (Chido blood group) (C4b), mRNA [NM_009780]
A_55_P2066578	8.55653	Ifi204	Mus musculus interferon activated gene 204, mRNA (cDNA clone MGC:18551 IMAGE:4018506), complete cds. [BC010546]
A_51_P428708	8.34942	C4b	Mus musculus complement component 4B (Chido blood group) (C4b), mRNA [NM_009780]
A_55_P1975560	8.04634	Ifi204	Mus musculus interferon activated gene 204 (Ifi204), mRNA [NM_008329]
A_51_P406188	7.82741	Asb10	Mus musculus ankyrin repeat and SOCS box-containing 10 (Asb10), mRNA [NM_080444]
A_55_P2157250	7.67111	Gfap	Mus musculus glial fibrillary acidic protein (Gfap), transcript variant 2, mRNA [NM_010277]
A_51_P108459	7.3945	Gpr65	Mus musculus G-protein coupled receptor 65 (Gpr65), mRNA [NM_008152]
A_55_P2745402	7.28279	C4a	Mus musculus complement component 4A (Rodgers blood group) (C4a), mRNA [NM_011413]
A_55_P2935501	6.83559	Cd180	Mus musculus activated spleen cDNA, RIKEN full-length enriched library, clone:F830005B01 product:lymphocyte antigen 78, full insert sequence. [AK089613]
A_52_P462657	6.76125	Gm11545	Mus musculus predicted gene 11545 (Gm11545), mRNA [NM_001105561]
A_55_P2067583	6.44449	Cd68	CD68 antigen [Source:MGI Symbol;Acc:MGI:88342] [ENSMUST00000108654]
A_51_P321150	6.41914	Lyz2	Mus musculus lysozyme 2 (Lyz2), mRNA [NM_017372]
A_52_P52303	6.37118	Gfap	Mus musculus glial fibrillary acidic protein (Gfap), transcript variant 1, mRNA [NM_001131020]
A_55_P2054445	6.225	Cd84	Mus musculus CD84 antigen (Cd84), transcript variant 1, mRNA [NM_013489]
A_30_P01017895	6.18043		lincRNA:chr1:175654606-175672031 reverse strand
A_51_P262515	5.82302	Phf11a	Mus musculus PHD finger protein 11A (Phf11a), mRNA [NM_172603]
A_52_P238027	5.67979	Lyz2	lysozyme 2 [Source:MGI Symbol;Acc:MGI:96897] [ENSMUST00000092163]
A_55_P2181738	5.61407	Lyz1	Mus musculus lysozyme 1 (Lyz1), mRNA [NM_013590]
A_51_P151126	5.58174	Cd52	Mus musculus CD52 antigen (Cd52), mRNA [NM_013706]
A_55_P2169669	5.50861	Csf1	Mus musculus colony stimulating factor 1 (macrophage) (Csf1), transcript variant 3, mRNA [NM_001113530]
A_55_P1978424	5.38488	Bcl2a1d	Mus musculus B cell leukemia/lymphoma 2 related protein A1d (Bcl2a1d), mRNA [NM_007536]
A_55_P2017914	5.23035	Csf1	Mus musculus colony stimulating factor 1 (macrophage) (Csf1), transcript variant 3, mRNA [NM_001113530]
A_52_P467389	5.03926	Slc15a3	Mus musculus solute carrier family 15, member 3 (Slc15a3), mRNA [NM_023044]
A_51_P261517	4.9138	Tyrobp	Mus musculus TYRO protein tyrosine kinase binding protein (Tyrobp), mRNA [NM_011662]
A_51_P387123	4.88848	Oasl2	Mus musculus 2'-5' oligoadenylate synthetase-like 2 (Oasl2), mRNA [NM_011854]
A_55_P2044932	4.81875	Gpr84	Mus musculus G protein-coupled receptor 84 (Gpr84), mRNA [NM_030720]
A_52_P700056	4.74257	Wfdc17	Mus musculus WAP four-disulfide core domain 17 (Wfdc17), mRNA [NM_001081957]
A_55_P1962937	4.7425	Trem2	Mus musculus triggering receptor expressed on myeloid cells 2 (Trem2), transcript variant 2, mRNA [NM_001272078]
A_30_P01031526	4.61339		lincRNA:chr1:175654606-175672031 reverse strand
A_51_P452629	4.58787	Tlr2	Mus musculus toll-like receptor 2 (Tlr2), mRNA [NM_011905]
A_55_P2132549	4.55185	Cd48	Mus musculus CD48 antigen (Cd48), mRNA [NM_007649]
A_51_P120470	4.46199	Cd68	Mus musculus CD68 antigen (Cd68), transcript variant 1, mRNA [NM_001291058]
A_52_P110070	4.42501	5730416F02Rik	Mus musculus RIKEN cDNA 5730416F02 gene (5730416F02Rik), non-coding RNA [NR_033596]
A_55_P2744772	4.39953	Treml2	Mus musculus triggering receptor expressed on myeloid cells-like 2 (Treml2), mRNA [NM_001033405]
A_55_P1961943	4.37685	Cd68	Mus musculus CD68 antigen (Cd68), transcript variant 1, mRNA [NM_001291058]
A_52_P452689	4.31394	Atf3	Mus musculus activating transcription factor 3 (Atf3), mRNA [NM_007498]
A_65_P14603	4.27885	AU020206	Mus musculus 3 days neonate thymus cDNA, RIKEN full-length enriched library, clone:A630040D01 product:unclassifiable, full insert sequence. [AK080297]
A_51_P483280	4.23343	Prnp	Mus musculus prion protein (Prnp), transcript variant 1, mRNA [NM_011170]
A_52_P442567	4.19461	Trim30a	Mus musculus tripartite motif-containing 30A (Trim30a), mRNA [NM_009099]
A_55_P2171116	4.15209	Lgals3	Mus musculus lectin, galactose binding, soluble 3 (Lgals3), transcript variant 1, mRNA [NM_001145953]
A_55_P1998943	4.13714	Oas1a	Mus musculus 2'-5' oligoadenylate synthetase 1A (Oas1a), mRNA [NM_145211]
A_52_P299771	4.13704	Bcl2a1c	Mus musculus B cell leukemia/lymphoma 2 related protein A1c (Bcl2a1c), mRNA [NM_007535]
A_51_P246066	4.13381	Slamf9	Mus musculus SLAM family member 9 (Slamf9), mRNA [NM_029612]
A_51_P112966	4.13019	Ch25h	Mus musculus cholesterol 25-hydroxylase (Ch25h), mRNA [NM_009890]
A_55_P2038262	4.03453	Phf11b	Mus musculus PHD finger protein 11B (Phf11b), mRNA [NM_001164327]
A_30_P01024163	4.00736		lincRNA:chr1:175705225-175717250 reverse strand
A_51_P359636	3.94322	Lgals3bp	Mus musculus lectin, galactoside-binding, soluble, 3 binding protein (Lgals3bp), mRNA [NM_011150]
A_55_P2133248	3.91683		predicted gene 8995 [Source:MGI Symbol;Acc:MGI:3644223] [ENSMUST00000184842]
A_51_P447976	3.91009	Fam46c	Mus musculus family with sequence similarity 46, member C (Fam46c), mRNA [NM_001142952]
A_52_P545613	3.90578	Fcgr2b	Mus musculus Fc receptor, IgG, low affinity IIb (Fcgr2b), transcript variant 2, mRNA [NM_010187]
A_52_P646832	3.81148	Samsn1	Mus musculus SAM domain, SH3 domain and nuclear localization signals, 1 (Samsn1), mRNA [NM_023380]
A_51_P312336	3.81072	Slc14a1	Mus musculus solute carrier family 14 (urea transporter), member 1 (Slc14a1), transcript variant 2, mRNA [NM_028122]
A_55_P1960053	3.78811	Hvcn1	Mus musculus hydrogen voltage-gated channel 1 (Hvcn1), transcript variant 1, mRNA [NM_001042489]
A_52_P244682	3.78767	Rab7b	Mus musculus RIKEN cDNA 5430435G22 gene (5430435G22Rik), mRNA [NM_145509]
A_55_P2015687	3.78317	Phf11d	Mus musculus PHD finger protein 11D (Phf11d), mRNA [NM_199015]
A_51_P438967	3.75252	Gpnmb	Mus musculus glycoprotein (transmembrane) nmb (Gpnmb), mRNA [NM_053110]
A_55_P1990032	3.742	Cxcl5	Mus musculus chemokine (C-X-C motif) ligand 5 (Cxcl5), mRNA [NM_009141]
A_30_P01024661	3.73607		lincRNA:chr7:111526943-111545093 reverse strand
A_52_P249514	3.72452	Ccl12	Mus musculus chemokine (C-C motif) ligand 12 (Ccl12), mRNA [NM_011331]
A_51_P449325	3.69834	H2-Oa	Mus musculus histocompatibility 2, O region alpha locus (H2-Oa), mRNA [NM_008206]
A_51_P282837	3.68669	St14	Mus musculus suppression of tumorigenicity 14 (colon carcinoma) (St14), mRNA [NM_011176]
A_52_P180373	3.6533	Mpeg1	Mus musculus macrophage expressed gene 1 (Mpeg1), mRNA [NM_010821]
A_65_P00912	3.64547	Fam46c	family with sequence similarity 46, member C [Source:MGI Symbol;Acc:MGI:1921895] [ENSMUST00000061455]
A_52_P11901	3.64105	Ptprc	Mus musculus protein tyrosine phosphatase, receptor type, C (Ptprc), transcript variant 2, mRNA [NM_011210]
A_51_P251022	3.59191	Plscr2	Mus musculus phospholipid scramblase 2 (Plscr2), transcript variant B, mRNA [NM_008880]
A_51_P390538	3.58367	Mpeg1	Mus musculus macrophage expressed gene 1 (Mpeg1), mRNA [NM_010821]
A_51_P465350	3.57608	Ly86	Mus musculus lymphocyte antigen 86 (Ly86), mRNA [NM_010745]
A_66_P137861	3.55548	Tlr1	Mus musculus toll-like receptor 1 (Tlr1), transcript variant 2, mRNA [NM_001276445]
A_55_P1956497	3.54773	Serpinf2	Mus musculus serine (or cysteine) peptidase inhibitor, clade F, member 2 (Serpinf2), mRNA [NM_008878]
A_55_P2087622	3.52756	Il4i1	Mus musculus interleukin 4 induced 1 (Il4i1), mRNA [NM_010215]
A_52_P124734	3.52738	Cybrd1	Mus musculus cytochrome b reductase 1 (Cybrd1), mRNA [NM_028593]
A_55_P2804638	3.50848	Cd14	Mus musculus CD14 antigen (Cd14), mRNA [NM_009841]
A_55_P2574200	3.49418	Gm31740	PREDICTED: Mus musculus predicted gene, 31740 (Gm31740), ncRNA [XR_391642]
A_55_P2487504	3.47201	Cd84	Mus musculus CD84 antigen (Cd84), transcript variant 2, mRNA [NM_001252472]
A_51_P186476	3.46573	Slc11a1	Mus musculus solute carrier family 11 (proton-coupled divalent metal ion transporters), member 1 (Slc11a1), mRNA [NM_013612]
A_51_P154842	3.45804	Oas1f	Mus musculus 2'-5' oligoadenylate synthetase 1F (Oas1f), mRNA [NM_145153]
A_55_P2734707	3.45155	Trim30a	Mus musculus adult male hypothalamus cDNA, RIKEN full-length enriched library, clone:A230045A11 product:tripartite motif protein 30, full insert sequence. [AK138249]
A_52_P354823	3.4115	Irf8	Mus musculus interferon regulatory factor 8 (Irf8), transcript variant 2, mRNA [NM_008320]
A_51_P130095	3.3943	Fcgr2b	Mus musculus Fc receptor, IgG, low affinity IIb (Fcgr2b), transcript variant 1, mRNA [NM_001077189]
A_55_P1984243	3.39421	Naip2	Mus musculus NLR family, apoptosis inhibitory protein 2 (Naip2), transcript variant 1, mRNA [NM_010872]
A_55_P2066116	3.29332	Bcl3	Mus musculus B cell leukemia/lymphoma 3 (Bcl3), mRNA [NM_033601]
A_51_P270741	3.28033	Syngr1	Mus musculus synaptogyrin 1 (Syngr1), transcript variant 1b, mRNA [NM_009303]
A_51_P448664	3.26337	Tbxas1	Mus musculus thromboxane A synthase 1, platelet (Tbxas1), mRNA [NM_011539]
A_55_P2494857	3.22898	Slc14a1	Mus musculus solute carrier family 14 (urea transporter), member 1 (Slc14a1), transcript variant 1, mRNA [NM_001171010]
A_55_P2114953	3.22665	Usp18	Mus musculus ubiquitin specific peptidase 18 (Usp18), mRNA [NM_011909]
A_51_P172853	3.17141	Cd14	Mus musculus CD14 antigen (Cd14), mRNA [NM_009841]
A_55_P2133195	3.15685	Gm4951	Mus musculus predicted gene 4951 (Gm4951), mRNA [NM_001033767]
A_52_P677117	3.11578	Ptprc	Mus musculus protein tyrosine phosphatase, receptor type, C (Ptprc), transcript variant 2, mRNA [NM_011210]
A_51_P296764	3.08096	Fcgr1	Mus musculus Fc receptor, IgG, high affinity I (Fcgr1), mRNA [NM_010186]
A_55_P2146560	3.05211	H2-Ab1	Mus musculus histocompatibility 2, class II antigen A, beta 1 (H2-Ab1), mRNA [NM_207105]
A_55_P1999364	3.01802	Krt85	Mus musculus keratin 85 (Krt85), mRNA [NM_016879]
A_66_P112305	3.00484	Myo1f	Mus musculus myosin IF (Myo1f), mRNA [NM_053214]
A_52_P683598	2.9993	H2-Ab1	Mus musculus histocompatibility 2, class II antigen A, beta 1 (H2-Ab1), mRNA [NM_207105]
A_55_P2734922	2.99883	Siglech	Mus musculus sialic acid binding Ig-like lectin H (Siglech), mRNA [NM_178706]
A_55_P2911888	2.98932	Ifit1	Mus musculus interferon-induced protein with tetratricopeptide repeats 1 (Ifit1), mRNA [NM_008331]
A_55_P2016034	2.97652	Nlrc5	Mus musculus NLR family, CARD domain containing 5 (Nlrc5), mRNA [NM_001033207]
A_55_P2823856	2.97615	Siglecf	Mus musculus sialic acid binding Ig-like lectin F (Siglecf), transcript variant 1, mRNA [NM_145581]
A_55_P1962747	2.96733	H2-Ab1	Mus musculus histocompatibility 2, class II antigen A, beta 1 (H2-Ab1), mRNA [NM_207105]
A_52_P638459	2.96657	Ccl5	Mus musculus chemokine (C-C motif) ligand 5 (Ccl5), mRNA [NM_013653]
A_51_P294555	2.96301	Ifitm6	Mus musculus interferon induced transmembrane protein 6 (Ifitm6), mRNA [NM_001033632]
A_55_P2117656	2.94194	Slfn8	Mus musculus schlafen 8 (Slfn8), transcript variant 1, mRNA [NM_181545]
A_55_P2935500	2.93875	Cd180	Mus musculus activated spleen cDNA, RIKEN full-length enriched library, clone:F830005B01 product:lymphocyte antigen 78, full insert sequence. [AK089613]
A_55_P1994042	2.93273	Zbp1	Mus musculus Z-DNA binding protein 1 (Zbp1), transcript variant 2, mRNA [NM_001139519]
A_55_P2505725	2.9314	Ptpn6	Mus musculus protein tyrosine phosphatase, non-receptor type 6 (Ptpn6), transcript variant 2, mRNA [NM_001077705]
A_52_P114722	2.92349	Ptpn6	Mus musculus protein tyrosine phosphatase, non-receptor type 6 (Ptpn6), transcript variant 2, mRNA [NM_001077705]
A_51_P169693	2.89671	Bst2	Mus musculus bone marrow stromal cell antigen 2 (Bst2), mRNA [NM_198095]
A_55_P2716756	2.89479	Irf8	interferon regulatory factor 8 [Source:MGI Symbol;Acc:MGI:96395] [ENSMUST00000162775]
A_55_P2088145	2.87039
A_51_P181517	2.84298	Fcgr4	Mus musculus Fc receptor, IgG, low affinity IV (Fcgr4), mRNA [NM_144559]
A_51_P423981	2.84041	Ctss	Mus musculus cathepsin S (Ctss), transcript variant 2, mRNA [NM_021281]
A_51_P405476	2.82009	Fcer1g	Mus musculus Fc receptor, IgE, high affinity I, gamma polypeptide (Fcer1g), mRNA [NM_010185]
A_55_P2744251	2.79076	Irf7	Mus musculus interferon regulatory factor 7 (Irf7), transcript variant 1, mRNA [NM_016850]
A_51_P504991	2.78446	Slfn9	Mus musculus schlafen 9 (Slfn9), mRNA [NM_172796]
A_51_P103222	2.78428	Slc39a4	Mus musculus solute carrier family 39 (zinc transporter), member 4 (Slc39a4), mRNA [NM_028064]
A_51_P285736	2.78225	Pdcd1	Mus musculus programmed cell death 1 (Pdcd1), mRNA [NM_008798]
A_55_P1979341	2.77216	Cyba	Mus musculus cytochrome b-245, alpha polypeptide (Cyba), transcript variant 1, mRNA [NM_007806]
A_55_P2129047	2.76017	Tlr7	Mus musculus toll-like receptor 7 (Tlr7), transcript variant 1, mRNA [NM_001290755]
A_55_P2900592	2.75492	Lpl	Mus musculus NOD-derived CD11c +ve dendritic cells cDNA, RIKEN full-length enriched library, clone:F630030D22 product:lipoprotein lipase, full insert sequence. [AK154419]
A_51_P102789	2.7338	C1qc	Mus musculus complement component 1, q subcomponent, C chain (C1qc), mRNA [NM_007574]
A_51_P242930	2.72046	Lat2	Mus musculus linker for activation of T cells family, member 2 (Lat2), transcript variant 1, mRNA [NM_020044]
A_51_P284608	2.7148	Cd74	Mus musculus CD74 antigen (invariant polypeptide of major histocompatibility complex, class II antigen-associated) (Cd74), transcript variant 1, mRNA [NM_001042605]
A_51_P256665	2.70203	Pon3	Mus musculus paraoxonase 3 (Pon3), mRNA [NM_173006]
A_51_P374198	2.69143	Cxcl16	Mus musculus chemokine (C-X-C motif) ligand 16 (Cxcl16), mRNA [NM_023158]
A_52_P199633	2.67333	Trim30d	Mus musculus tripartite motif-containing 30D (Trim30d), transcript variant 1, mRNA [NM_199146]
A_55_P2635931	2.66882	Plek	Mus musculus pleckstrin (Plek), mRNA [NM_019549]
A_52_P99810	2.66702	Cx3cr1	Mus musculus chemokine (C-X3-C motif) receptor 1 (Cx3cr1), mRNA [NM_009987]
A_51_P264825	2.66085	Lag3	Mus musculus lymphocyte-activation gene 3 (Lag3), mRNA [NM_008479]
A_55_P2741874	2.65661	H2-Ab1	Mus musculus histocompatibility 2, class II antigen A, beta 1 (H2-Ab1), mRNA [NM_207105]
A_51_P165244	2.65406	Gbp3	Mus musculus guanylate binding protein 3 (Gbp3), transcript variant 2, mRNA [NM_018734]
A_66_P111502	2.6478	Cyba	Mus musculus cytochrome b-245, alpha polypeptide (Cyba), transcript variant 2, mRNA [NM_001301284]
A_55_P2038757	2.62629	Fblim1	Mus musculus filamin binding LIM protein 1 (Fblim1), transcript variant 2, mRNA [NM_133754]
A_55_P2129354	2.62453	Pilra	Mus musculus paired immunoglobin-like type 2 receptor alpha (Pilra), mRNA [NM_153510]
A_51_P355122	2.62305	Tnni2	Mus musculus troponin I, skeletal, fast 2 (Tnni2), mRNA [NM_009405]
A_51_P262208	2.61143	Itgb2	Mus musculus integrin beta 2 (Itgb2), mRNA [NM_008404]
A_51_P316042	2.58523	Card11	Mus musculus caspase recruitment domain family, member 11 (Card11), mRNA [NM_175362]
A_51_P387239	2.58357	Iigp1	Mus musculus interferon inducible GTPase 1 (Iigp1), transcript variant 1, mRNA [NM_021792]
A_51_P130079	2.57791	Lrmp	Mus musculus lymphoid-restricted membrane protein (Lrmp), transcript variant 1, mRNA [NM_008511]
A_55_P2169356	2.57048	Gm1966	Mus musculus predicted gene 1966 (Gm1966), transcript variant 5, mRNA [NM_001277183]
A_52_P52618	2.56273	Csf2rb	Mus musculus colony stimulating factor 2 receptor, beta, low-affinity (granulocyte-macrophage) (Csf2rb), mRNA [NM_007780]
A_52_P764477	2.55961	Gm8995	PREDICTED: Mus musculus predicted gene 8995 (Gm8995), misc_RNA [XR_378400]
A_55_P2044710	2.55872	Asb10	Mus musculus ankyrin repeat and SOCS box-containing 10 (Asb10), mRNA [NM_080444]
A_55_P2715496	2.55543	1700003F12Rik	Mus musculus RIKEN cDNA 1700003F12 gene (1700003F12Rik), mRNA [NM_029305]
A_55_P2129348	2.55136	Pilra	Mus musculus paired immunoglobin-like type 2 receptor alpha (Pilra), mRNA [NM_153510]
A_51_P147942	2.54315	Igf1	Mus musculus insulin-like growth factor 1 (Igf1), transcript variant 1, mRNA [NM_010512]
A_52_P380369	2.54186	Phf11d	Mus musculus DNA segment, Chr 14, ERATO Doi 668, expressed, mRNA (cDNA clone MGC:29273 IMAGE:5067268), complete cds. [BC030186]
A_55_P2091551	2.52973	Arhgap9	Mus musculus Rho GTPase activating protein 9 (Arhgap9), transcript variant 1, mRNA [NM_001285785]
A_51_P401668	2.52856	Laptm5	Mus musculus lysosomal-associated protein transmembrane 5 (Laptm5), mRNA [NM_010686]
A_51_P181451	2.52785	C1qa	Mus musculus complement component 1, q subcomponent, alpha polypeptide (C1qa), mRNA [NM_007572]
A_52_P145861	2.52693	Cd86	Mus musculus CD86 antigen (Cd86), mRNA [NM_019388]
A_52_P16873	2.52562	Rasal3	Mus musculus RAS protein activator like 3 (Rasal3), mRNA [NM_178785]
A_55_P2806229	2.50565	Ncf2	Mus musculus neutrophil cytosolic factor 2 (Ncf2), mRNA [NM_010877]
A_55_P2716281	2.50528	Ptprc	protein tyrosine phosphatase, receptor type, C [Source:MGI Symbol;Acc:MGI:97810] [ENSMUST00000185570]
A_55_P2086433	2.49923	Oasl1	Mus musculus 2'-5' oligoadenylate synthetase-like 1 (Oasl1), mRNA [NM_145209]
A_55_P2174490	2.49786	Cd37	Mus musculus CD37 antigen (Cd37), transcript variant 1, mRNA [NM_001290802]
A_66_P105689	2.4925	Trim34a	Mus musculus tripartite motif-containing 34A (Trim34a), mRNA [NM_030684]
A_51_P484020	2.49099	AF251705	Mus musculus cDNA sequence AF251705 (AF251705), mRNA [NM_134158]
A_51_P384629	2.48491	Ctsd	Mus musculus cathepsin D (Ctsd), mRNA [NM_009983]
A_52_P189772	2.48397	Gbp6	Mus musculus guanylate binding protein 6 (Gbp6), mRNA [NM_194336]
A_52_P670026	2.48099	Rsad2	Mus musculus radical S-adenosyl methionine domain containing 2 (Rsad2), mRNA [NM_021384]
A_66_P138645	2.47313	Mir142hg	Mus musculus 0 day neonate thymus cDNA, RIKEN full-length enriched library, clone:A430104N18 product:unclassifiable, full insert sequence. [AK020764]
A_55_P1998631	2.46529	Capg	Mus musculus capping protein (actin filament), gelsolin-like (Capg), transcript variant 2, mRNA [NM_001042534]
A_51_P328613	2.46152	Fcgr3	Mouse Fc gamma receptor (IgG 2.4G2 receptor mRNA, complete cds. [M14215]
A_55_P1984695	2.45574	Ip6k3	Mus musculus inositol hexaphosphate kinase 3 (Ip6k3), mRNA [NM_173027]
A_51_P297679	2.44057	Hcls1	Mus musculus hematopoietic cell specific Lyn substrate 1 (Hcls1), mRNA [NM_008225]
A_55_P1966194	2.43631	Plek	Mus musculus pleckstrin (Plek), mRNA [NM_019549]
A_66_P140773	2.43024	Cd9	Mus musculus CD9 antigen (Cd9), mRNA [NM_007657]
A_51_P503797	2.42717	Lair1	Mus musculus leukocyte-associated Ig-like receptor 1 (Lair1), transcript variant b, mRNA [NM_178611]
A_66_P116120	2.40875	Hcst	Mus musculus hematopoietic cell signal transducer (Hcst), mRNA [NM_011827]
A_66_P133594	2.40496	5730416F02Rik	Mus musculus 8 days embryo whole body cDNA, RIKEN full-length enriched library, clone:5730416F02 product:similar to CAPPING PROTEIN (ACTIN FILAMENT), GELSOLIN-LIKE [Mus musculus], full insert sequence. [AK017567]
A_51_P211491	2.4031	Gusb	Mus musculus glucuronidase, beta (Gusb), mRNA [NM_010368]
A_52_P408757	2.39415	Fcgr3	Mus musculus Fc receptor, IgG, low affinity III (Fcgr3), mRNA [NM_010188]
A_51_P502906	2.39151		angiogenin, ribonuclease A family, pseudogene 1 [Source:MGI Symbol;Acc:MGI:104986] [ENSMUST00000162314]
A_55_P2069306	2.38636	Ptpn18	Mus musculus protein tyrosine phosphatase, non-receptor type 18 (Ptpn18), mRNA [NM_011206]
A_51_P121891	2.3827	Rac2	Mus musculus RAS-related C3 botulinum substrate 2 (Rac2), mRNA [NM_009008]
A_51_P451458	2.381	Mamdc2	Mus musculus MAM domain containing 2 (Mamdc2), mRNA [NM_174857]
A_51_P185660	2.36452	Ccl9	Mus musculus chemokine (C-C motif) ligand 9 (Ccl9), mRNA [NM_011338]
A_51_P247249	2.36184	Alox5	Mus musculus arachidonate 5-lipoxygenase (Alox5), mRNA [NM_009662]
A_51_P159453	2.35829	Serpina3n	Mus musculus serine (or cysteine) peptidase inhibitor, clade A, member 3N (Serpina3n), mRNA [NM_009252]
A_55_P2017347	2.3558	Krtap11-1	Mus musculus keratin associated protein 11-1 (Krtap11-1), mRNA [NM_001113406]
A_66_P125627	2.35516	Slc34a2	solute carrier family 34 (sodium phosphate), member 2 [Source:MGI Symbol;Acc:MGI:1342284] [ENSMUST00000170523]
A_51_P185906	2.35162	Abi3	Mus musculus ABI gene family, member 3 (Abi3), transcript variant 1, mRNA [NM_025659]
A_51_P101929	2.3511	Lgals3	Mus musculus lectin, galactose binding, soluble 3 (Lgals3), transcript variant 2, mRNA [NM_010705]
A_52_P170188	2.35109	Hcst	Mus musculus hematopoietic cell signal transducer (Hcst), mRNA [NM_011827]
A_51_P345367	2.34668	Psmb8	Mus musculus proteasome (prosome, macropain) subunit, beta type 8 (large multifunctional peptidase 7) (Psmb8), mRNA [NM_010724]
A_51_P351860	2.34612	C1qb	Mus musculus complement component 1, q subcomponent, beta polypeptide (C1qb), mRNA [NM_009777]
A_51_P477540	2.34036	Lyzl4	Mus musculus lysozyme-like 4 (Lyzl4), mRNA [NM_026915]
A_52_P512201	2.33988	Sp110	Mus musculus Sp110 nuclear body protein (Sp110), transcript variant 1, mRNA [NM_175397]
A_51_P109508	2.33655	Havcr2	Mus musculus hepatitis A virus cellular receptor 2 (Havcr2), mRNA [NM_134250]
A_55_P2746444	2.33228	Runx1	Mus musculus runt related transcription factor 1 (Runx1), transcript variant 3, mRNA [NM_001111023]
A_55_P1993984	2.32762	Hemk1	Mus musculus HemK methyltransferase family member 1 (Hemk1), mRNA [NM_133984]
A_55_P2819599	2.31407	Ncf2	Mus musculus neutrophil cytosolic factor 2 (Ncf2), mRNA [NM_010877]
A_55_P2350617	2.30751	Slc37a2	Mus musculus solute carrier family 37 (glycerol-3-phosphate transporter), member 2 (Slc37a2), transcript variant 1, mRNA [NM_001145960]
A_52_P33221	2.30006	Apbb1ip	Mus musculus amyloid beta (A4) precursor protein-binding, family B, member 1 interacting protein (Apbb1ip), mRNA [NM_019456]
A_55_P2185605	2.29826	Cd48	Mus musculus CD48 antigen (Cd48), mRNA [NM_007649]
A_51_P256202	2.28674	Ctsz	Mus musculus cathepsin Z (Ctsz), mRNA [NM_022325]
A_51_P440365	2.26098	Frrs1	Mus musculus ferric-chelate reductase 1 (Frrs1), transcript variant 2, mRNA [NM_009146]
A_55_P1984886	2.25684	Hcst	Mus musculus hematopoietic cell signal transducer (Hcst), mRNA [NM_011827]
A_55_P2762554	2.24961	Ifitm3	Mus musculus interferon induced transmembrane protein 3 (Ifitm3), mRNA [NM_025378]
A_66_P114333	2.24913	Tlr12	Mus musculus toll-like receptor 12 (Tlr12), mRNA [NM_205823]
A_55_P2103698	2.24394	Isg15	Mus musculus ISG15 ubiquitin-like modifier (Isg15), mRNA [NM_015783]
A_55_P2056606	2.23994
A_55_P2116385	2.23748	Gpr183	Mus musculus G protein-coupled receptor 183 (Gpr183), mRNA [NM_183031]
A_51_P377452	2.23384	Ncf4	Mus musculus neutrophil cytosolic factor 4 (Ncf4), mRNA [NM_008677]
A_55_P2042823	2.23326	Sh3bp2	Mus musculus SH3-domain binding protein 2 (Sh3bp2), transcript variant 2, mRNA [NM_001145859]
A_55_P2716746	2.2316	Usp5	ubiquitin specific peptidase 5 (isopeptidase T) [Source:MGI Symbol;Acc:MGI:1347343] [ENSMUST00000141042]
A_51_P304170	2.22803	Rtp4	Mus musculus receptor transporter protein 4 (Rtp4), mRNA [NM_023386]
A_51_P364600	2.2254	Fyb	Mus musculus FYN binding protein (Fyb), transcript variant 1, mRNA [NM_011815]
A_51_P359570	2.22473	Ifit3	Mus musculus interferon-induced protein with tetratricopeptide repeats 3 (Ifit3), mRNA [NM_010501]
A_52_P267391	2.22414	Trim12a	Mus musculus tripartite motif-containing 12A (Trim12a), mRNA [NM_023835]
A_55_P2119957	2.22112	Mlxipl	Mus musculus MLX interacting protein-like (Mlxipl), mRNA [NM_021455]
A_66_P134474	2.21051	Ang3	Mus musculus angiogenin, ribonuclease A family, member 3 (Ang3), mRNA [NM_001123394]
A_55_P2482103	2.20553	Gngt2	Mus musculus guanine nucleotide binding protein (G protein), gamma transducing activity polypeptide 2 (Gngt2), transcript variant 3, mRNA [NM_001284393]
A_51_P514712	2.19895	Parp14	Mus musculus poly (ADP-ribose) polymerase family, member 14 (Parp14), mRNA [NM_001039530]
A_52_P231075	2.19676	Fcrls	Mus musculus Fc receptor-like S, scavenger receptor (Fcrls), mRNA [NM_030707]
A_55_P2944079	2.19567	Wdr82	WD repeat domain containing 82 [Source:MGI Symbol;Acc:MGI:1924555] [ENSMUST00000191147]
A_55_P2840505	2.19291	Focad	focadhesin [Source:MGI Symbol;Acc:MGI:2676921] [ENSMUST00000162039]
A_51_P451032	2.18405	Anxa3	Mus musculus annexin A3 (Anxa3), mRNA [NM_013470]
A_51_P453111	2.17973	Hexb	Mus musculus hexosaminidase B (Hexb), mRNA [NM_010422]
A_66_P124326	2.17718	Ctsh	Mus musculus cathepsin H (Ctsh), mRNA [NM_007801]
A_55_P2753026	2.1746	Hpgds	PREDICTED: Mus musculus hematopoietic prostaglandin D synthase (Hpgds), transcript variant X2, mRNA [XM_006506399]
A_52_P63044	2.17318	Lsp1	Mus musculus lymphocyte specific 1 (Lsp1), transcript variant 2, mRNA [NM_019391]
A_55_P1971951	2.17057	Cd86	Mus musculus CD86 antigen (Cd86), mRNA [NM_019388]
A_55_P2744310	2.16734	Hcst	Mus musculus hematopoietic cell signal transducer (Hcst), mRNA [NM_011827]
A_51_P400543	2.15637	Aif1	Mus musculus allograft inflammatory factor 1 (Aif1), mRNA [NM_019467]
A_52_P308413	2.15376	1810011H11Rik	Mus musculus RIKEN cDNA 1810011H11 gene (1810011H11Rik), mRNA [NM_001163616]
A_55_P2504765	2.14737	Apbb1ip	Mus musculus amyloid beta (A4) precursor protein-binding, family B, member 1 interacting protein (Apbb1ip), mRNA [NM_019456]
A_51_P150678	2.14309	Tnfaip8l2	Mus musculus tumor necrosis factor, alpha-induced protein 8-like 2 (Tnfaip8l2), mRNA [NM_027206]
A_55_P2151986	2.14116	Gngt2	Mus musculus guanine nucleotide binding protein (G protein), gamma transducing activity polypeptide 2 (Gngt2), transcript variant 3, mRNA [NM_001284393]
A_52_P51078	2.13705	Ctsh	Mus musculus cathepsin H (Ctsh), mRNA [NM_007801]
A_55_P2042743	2.12882	Glrp1	Mus musculus glutamine repeat protein 1 (Glrp1), mRNA [NM_008132]
A_52_P909274	2.12839	Pros1	Mus musculus protein S (alpha) (Pros1), mRNA [NM_011173]
A_55_P2912261	2.11767	Cd44	Mus musculus CD44 antigen (Cd44), transcript variant 1, mRNA [NM_009851]
A_55_P2118570	2.11405	Cd37	Mus musculus CD37 antigen (Cd37), transcript variant 1, mRNA [NM_001290802]
A_52_P300981	2.11139	Apbb1ip	amyloid beta (A4) precursor protein-binding, family B, member 1 interacting protein [Source:MGI Symbol;Acc:MGI:1861354] [ENSMUST00000148315]
A_65_P12392	2.11018	Timp2	Mus musculus tissue inhibitor of metalloproteinase 2 (Timp2), mRNA [NM_011594]
A_52_P99888	2.1027	Cxcl16	Mus musculus chemokine (C-X-C motif) ligand 16 (Cxcl16), mRNA [NM_023158]
A_55_P2036567	2.10028	Vav1	Mus musculus vav 1 oncogene (Vav1), transcript variant 1, mRNA [NM_011691]
A_55_P2155116	2.0983	Gm5086	Mus musculus predicted gene 5086 (Gm5086), long non-coding RNA [NR_046157]
A_66_P127452	2.09726	Hk3	Mus musculus hexokinase 3 (Hk3), transcript variant 1, mRNA [NM_001033245]
A_55_P2717089	2.09444	P2ry6	Mus musculus pyrimidinergic receptor P2Y, G-protein coupled, 6 (P2ry6), mRNA [NM_183168]
A_55_P2488624	2.09177	Uba7	Mus musculus ubiquitin-like modifier activating enzyme 7 (Uba7), mRNA [NM_023738]
A_55_P2010066	2.09034	Capn3	Mus musculus calpain 3 (Capn3), transcript variant a, mRNA [NM_007601]
A_66_P101942	2.08819	Gm9706	PREDICTED: Mus musculus predicted gene 9706 (Gm9706), misc_RNA [XR_168557]
A_51_P346668	2.07832	Irf5	Mus musculus interferon regulatory factor 5 (Irf5), transcript variant 2, mRNA [NM_012057]
A_52_P536796	2.07825	Hpgds	Mus musculus hematopoietic prostaglandin D synthase (Hpgds), mRNA [NM_019455]
A_55_P2039684	2.07401	Gpr34	Mus musculus G protein-coupled receptor 34 (Gpr34), mRNA [NM_011823]
A_55_P2056325	2.07143	Anxa3	Mus musculus annexin A3 (Anxa3), mRNA [NM_013470]
A_51_P278868	2.06748	H2-DMb1	Mus musculus histocompatibility 2, class II, locus Mb1 (H2-DMb1), mRNA [NM_010387]
A_55_P2788368	2.06576	Fyb	Mus musculus FYN binding protein (Fyb), transcript variant 2, mRNA [NM_001278269]
A_51_P279163	2.06019	Plcg2	Mus musculus phospholipase C, gamma 2 (Plcg2), mRNA [NM_172285]
A_51_P146753	2.05566	Csf2rb2	Mus musculus colony stimulating factor 2 receptor, beta 2, low-affinity (granulocyte-macrophage) (Csf2rb2), transcript variant 1, mRNA [NM_007781]
A_51_P423859	2.0501	Capn3	Mus musculus calpain 3 (Capn3), transcript variant a, mRNA [NM_007601]
A_51_P463628	2.04955	Vis1	PREDICTED: Mus musculus viral integration site 1 (Vis1), misc_RNA [XR_374337]
A_55_P2725249	2.04918	Gm16404	Mus musculus predicted gene 16404 (Gm16404), mRNA [NM_001220497]
A_51_P198434	2.04765	H2-K1	Mus musculus histocompatibility 2, K1, K region (H2-K1), transcript variant 1, mRNA [NM_001001892]
A_52_P681310	2.04582	Plaur	Mus musculus plasminogen activator, urokinase receptor (Plaur), mRNA [NM_011113]
A_51_P258098	2.03652	Tmem176a	Mus musculus transmembrane protein 176A (Tmem176a), transcript variant 1, mRNA [NM_025326]
A_51_P282557	2.03304	C3ar1	Mus musculus complement component 3a receptor 1 (C3ar1), mRNA [NM_009779]
A_52_P577748	2.02639	Lpxn	Mus musculus leupaxin (Lpxn), mRNA [NM_134152]
A_65_P07361	2.02453	Trim14	Mus musculus tripartite motif-containing 14 (Trim14), mRNA [NM_029077]
A_55_P1957413	2.024	Lsp1	Mus musculus lymphocyte specific 1 (Lsp1), transcript variant 2, mRNA [NM_019391]
A_66_P125929	2.02377	Tap1	Mus musculus transporter 1, ATP-binding cassette, sub-family B (MDR/TAP) (Tap1), transcript variant 1, mRNA [NM_013683]
A_51_P167263	2.02348	Cd5	Mus musculus CD5 antigen (Cd5), mRNA [NM_007650]
A_55_P2802921	2.02175	Rasgrp3	Mus musculus RAS, guanyl releasing protein 3 (Rasgrp3), transcript variant 1, mRNA [NM_001166493]
A_55_P2113210	2.01031	Cyth4	Mus musculus cytohesin 4 (Cyth4), mRNA [NM_028195]
A_51_P369803	2.00907	Psmb9	Mus musculus proteasome (prosome, macropain) subunit, beta type 9 (large multifunctional peptidase 2) (Psmb9), mRNA [NM_013585]
A_51_P269793	2.00796	Hacd4	3-hydroxyacyl-CoA dehydratase 4 [Source:MGI Symbol;Acc:MGI:1914025] [ENSMUST00000151280]
A_52_P199614	2.00386	Wdfy4	Mus musculus WD repeat and FYVE domain containing 4 (Wdfy4), mRNA [NM_001146022]
A_52_P220275	2.00242	Gpr34	Mus musculus G protein-coupled receptor 34 (Gpr34), mRNA [NM_011823]
A_52_P338956	1.99873	Aspg	Mus musculus asparaginase homolog (S. cerevisiae) (Aspg), mRNA [NM_001081169]
A_52_P223809	1.99111	Dhx58	Mus musculus DEXH (Asp-Glu-X-His) box polypeptide 58 (Dhx58), mRNA [NM_030150]
A_55_P1961270	1.98693	Cd72	Mus musculus CD72 antigen (Cd72), transcript variant 1, mRNA [NM_001110320]
A_51_P352875	1.98128	Lcp2	Mus musculus lymphocyte cytosolic protein 2 (Lcp2), mRNA [NM_010696]
A_52_P117393	1.9776	Tlr6	Mus musculus toll-like receptor 6 (Tlr6), mRNA [NM_011604]
A_52_P635338	1.97743	Fes	Mus musculus feline sarcoma oncogene (Fes), mRNA [NM_010194]
A_55_P2002103	1.97165	Hmha1	Mus musculus histocompatibility (minor) HA-1 (Hmha1), transcript variant 1, mRNA [NM_001142701]
A_52_P195839	1.97063	Ctsc	Mus musculus cathepsin C (Ctsc), mRNA [NM_009982]
A_55_P2943550	1.96766	St8sia6	Mus musculus ST8 alpha-N-acetyl-neuraminide alpha-2,8-sialyltransferase 6 (St8sia6), mRNA [NM_145838]
A_55_P2716491	1.96189	Ang6	Mus musculus angiogenin, ribonuclease A family, member 6 (Ang6), mRNA [NM_001011876]
A_55_P2066230	1.96038	Hck	Mus musculus hemopoietic cell kinase (Hck), transcript variant 1, mRNA [NM_001172117]
A_52_P56751	1.9602	Lcp1	Mus musculus lymphocyte cytosolic protein 1 (Lcp1), transcript variant 2, mRNA [NM_008879]
A_55_P2142863	1.95977	Parp9	Mus musculus poly (ADP-ribose) polymerase family, member 9 (Parp9), mRNA [NM_030253]
A_66_P136086	1.95658	Renbp	Mus musculus renin binding protein (Renbp), transcript variant 1, mRNA [NM_023132]
A_55_P1972605	1.95083	Adora3	Mus musculus adenosine A3 receptor (Adora3), mRNA [NM_009631]
A_55_P2722741	1.94141		predicted gene 5398 [Source:MGI Symbol;Acc:MGI:3646383] [ENSMUST00000121933]
A_51_P129012	1.93905	B2m	Mus musculus beta-2 microglobulin (B2m), mRNA [NM_009735]
A_51_P331279	1.93574	Arpc1b	Mus musculus actin related protein 2/3 complex, subunit 1B (Arpc1b), mRNA [NM_023142]
A_55_P2503970	1.9348	Elf4	Mus musculus E74-like factor 4 (ets domain transcription factor) (Elf4), mRNA [NM_019680]
A_51_P421140	1.92951	Tubb6	Mus musculus tubulin, beta 6 class V (Tubb6), mRNA [NM_026473]
A_51_P160754	1.92206	Apobec1	Mus musculus apolipoprotein B mRNA editing enzyme, catalytic polypeptide 1 (Apobec1), transcript variant 1, mRNA [NM_031159]
A_52_P535484	1.9211	Gvin1	Mus musculus GTPase, very large interferon inducible 1 (Gvin1), transcript variant 1, mRNA [NM_029000]
A_52_P528600	1.91936	Hhex	Mus musculus hematopoietically expressed homeobox (Hhex), mRNA [NM_008245]
A_55_P2745710	1.91547	H2-Q7	Mus musculus histocompatibility 2, Q region locus 7 (H2-Q7), transcript variant 1, mRNA [NM_010394]
A_55_P1959425	1.90438	Slc16a3	Mus musculus solute carrier family 16 (monocarboxylic acid transporters), member 3 (Slc16a3), mRNA [NM_030696]
A_52_P365011	1.90324	Fes	Mus musculus feline sarcoma oncogene (Fes), mRNA [NM_010194]
A_55_P1972872	1.90313	Ifit3b	Mus musculus RIKEN cDNA I830012O16 gene (I830012O16Rik), mRNA [NM_001005858]
A_66_P116275	1.89097	Gm2629	Mus musculus adult male hypothalamus cDNA, RIKEN full-length enriched library, clone:A230056E14 product:hypothetical protein, full insert sequence. [AK038705]
A_55_P2092526	1.88528	Tgif1	Mus musculus TGFB-induced factor homeobox 1 (Tgif1), transcript variant 1, mRNA [NM_001164075]
A_51_P514085	1.88176	Mx2	Mus musculus MX dynamin-like GTPase 2 (Mx2), transcript variant 1, mRNA [NM_013606]
A_55_P2798054	1.87826	Rhoh	Mus musculus ras homolog gene family, member H (Rhoh), mRNA [NM_001081105]
A_51_P258372	1.87611	Igsf6	Mus musculus immunoglobulin superfamily, member 6 (Igsf6), mRNA [NM_030691]
A_51_P159503	1.87085	Rnf213	ring finger protein 213 [Source:MGI Symbol;Acc:MGI:1289196] [ENSMUST00000093902]
A_51_P259296	1.8638	Lpl	Mus musculus lipoprotein lipase (Lpl), mRNA [NM_008509]
A_66_P105225	1.86111	Arpc1b	actin related protein 2/3 complex, subunit 1B [Source:MGI Symbol;Acc:MGI:1343142] [ENSMUST00000085679]
A_55_P2831026	1.85802	Sash3	Mus musculus SAM and SH3 domain containing 3 (Sash3), mRNA [NM_028773]
A_30_P01029993	1.8565		lincRNA:chr2:33661335-33669111 forward strand
A_52_P192426	1.85404	Tnfrsf1a	Mus musculus tumor necrosis factor receptor superfamily, member 1a (Tnfrsf1a), mRNA [NM_011609]
A_55_P1978465	1.85278	H2-Q5	Mus musculus histocompatibility 2, Q region locus 5 (H2-Q5), non-coding RNA [NR_051981]
A_52_P218058	1.85243	Clec5a	Mus musculus C-type lectin domain family 5, member a (Clec5a), transcript variant 1, mRNA [NM_001038604]
A_66_P123790	1.85106	Lpl	Mus musculus lipoprotein lipase (Lpl), mRNA [NM_008509]
A_55_P2808868	1.85085	Spint1	Mus musculus serine protease inhibitor, Kunitz type 1 (Spint1), mRNA [NM_016907]
A_51_P438821	1.8501	Pycard	Mus musculus PYD and CARD domain containing (Pycard), mRNA [NM_023258]
A_51_P392687	1.84891	Vim	Mus musculus vimentin (Vim), mRNA [NM_011701]
A_55_P2232057	1.84848	AU022793	Mus musculus expressed sequence AU022793 (AU022793), long non-coding RNA [NR_045719]
A_55_P1957633	1.84741	Gpsm3	Mus musculus G-protein signalling modulator 3 (AGS3-like, C. elegans) (Gpsm3), mRNA [NM_134116]
A_55_P2202539	1.84372	BC028789	Mus musculus cDNA sequence BC028789, mRNA (cDNA clone IMAGE:1263252), with apparent retained intron. [BC028789]
A_51_P204080	1.84316	Hk2	Mus musculus hexokinase 2 (Hk2), mRNA [NM_013820]
A_55_P2066613	1.83719	Lcp1	Mus musculus lymphocyte cytosolic protein 1 (Lcp1), transcript variant 2, mRNA [NM_008879]
A_55_P2099560	1.83099	Apobec1	Mus musculus apolipoprotein B mRNA editing enzyme, catalytic polypeptide 1 (Apobec1), transcript variant 1, mRNA [NM_031159]
A_65_P19395	1.82878	H2-D1	Mus musculus histocompatibility 2, D region locus 1 (H2-D1), mRNA [NM_010380]
A_51_P372992	1.82389	4632428N05Rik	Mus musculus RIKEN cDNA 4632428N05 gene (4632428N05Rik), transcript variant 1, mRNA [NM_028732]
A_55_P2736395	1.82024	Ccrl2	Mus musculus chemokine (C-C motif) receptor-like 2 (Ccrl2), transcript variant 1, mRNA [NM_017466]
A_66_P109986	1.81399	Cd33	Mus musculus CD33 antigen (Cd33), transcript variant 1, mRNA [NM_001111058]
A_52_P257812	1.81255	Lpl	Mus musculus lipoprotein lipase (Lpl), mRNA [NM_008509]
A_65_P01556	1.80894	Olfml3	olfactomedin-like 3 [Source:MGI Symbol;Acc:MGI:1914877] [ENSMUST00000154145]
A_55_P2070079	1.8039	Lgals9	Mus musculus lectin, galactose binding, soluble 9 (Lgals9), transcript variant 1, mRNA [NM_010708]
A_55_P2727704	1.8034	Gm32566	PREDICTED: Mus musculus predicted gene, 32566 (Gm32566), transcript variant X2, ncRNA [XR_865328]
A_51_P463120	1.8024	Hacd4	Mus musculus 3-hydroxyacyl-CoA dehydratase 4 (Hacd4), mRNA [NM_025760]
A_52_P1020860	1.80162	AW112010	Mus musculus expressed sequence AW112010 (AW112010), long non-coding RNA [NR_102366]
A_51_P110301	1.79611	C3	Mus musculus complement component 3 (C3), mRNA [NM_009778]
A_55_P2909287	1.79552	Grn	Mus musculus granulin (Grn), mRNA [NM_008175]
A_55_P2071466	1.79182	Ncf1	Mus musculus neutrophil cytosolic factor 1 (Ncf1), transcript variant 1, mRNA [NM_001286037]
A_51_P458866	1.79115	F11r	Mus musculus F11 receptor (F11r), mRNA [NM_172647]
A_55_P2097828	1.78251	Gmfg	Mus musculus glia maturation factor, gamma (Gmfg), transcript variant 1, mRNA [NM_022024]
A_51_P277792	1.78142	Ctsh	Mus musculus cathepsin H (Ctsh), mRNA [NM_007801]
A_55_P2166555	1.77703		predicted pseudogene 5637 [Source:MGI Symbol;Acc:MGI:3648120] [ENSMUST00000153890]
A_55_P2045916	1.777		histocompatibility 2, Q region locus 3 [Source:MGI Symbol;Acc:MGI:95932] [ENSMUST00000172583]
A_55_P2238406	1.77525	6330407A03Rik	Mus musculus RIKEN cDNA 6330407A03 gene (6330407A03Rik), long non-coding RNA [NR_028126]
A_52_P507382	1.77464	Unc93b1	Mus musculus unc-93 homolog B1 (C. elegans) (Unc93b1), transcript variant 1, mRNA [NM_019449]
A_51_P337125	1.77298	Inpp5d	Mus musculus inositol polyphosphate-5-phosphatase D (Inpp5d), transcript variant 1, mRNA [NM_010566]
A_51_P458778	1.76791	Hpgd	Mus musculus hydroxyprostaglandin dehydrogenase 15 (NAD) (Hpgd), mRNA [NM_008278]
A_51_P390715	1.766	Tgfb1	Mus musculus transforming growth factor, beta 1 (Tgfb1), mRNA [NM_011577]
A_66_P108468	1.76473	2610528A11Rik	Mus musculus RIKEN cDNA 2610528A11 gene (2610528A11Rik), mRNA [NM_001206684]
A_55_P2114938	1.76275	Irf9	Mus musculus interferon regulatory factor 9 (Irf9), transcript variant 1, mRNA [NM_001159417]
A_55_P1975400	1.76173	Flnc	Mus musculus filamin C, gamma (Flnc), mRNA [NM_001081185]
A_55_P2025078	1.76093	Csf1r	Mus musculus colony stimulating factor 1 receptor (Csf1r), mRNA [NM_001037859]
A_51_P309158	1.75826	Snx20	Mus musculus sorting nexin 20 (Snx20), mRNA [NM_027840]
A_55_P2809133	1.75637	Aldh1l2	Mus musculus aldehyde dehydrogenase 1 family, member L2 (Aldh1l2), mRNA [NM_153543]
A_55_P1965000	1.75584	Ddx58	Mus musculus DEAD (Asp-Glu-Ala-Asp) box polypeptide 58 (Ddx58), mRNA [NM_172689]
A_55_P2007964	1.74835	Cx3cr1	Mus musculus chemokine (C-X3-C motif) receptor 1 (Cx3cr1), mRNA [NM_009987]
A_51_P357341	1.74829	Clic1	Mus musculus chloride intracellular channel 1 (Clic1), mRNA [NM_033444]
A_55_P2048279	1.74741	Tlr13	Mus musculus toll-like receptor 13 (Tlr13), mRNA [NM_205820]
A_51_P183746	1.74645	Prrx2	Mus musculus paired related homeobox 2, mRNA (cDNA clone MGC:169496 IMAGE:8860891), complete cds. [BC137872]
A_55_P2831021	1.7457	Selplg	Mus musculus selectin, platelet (p-selectin) ligand (Selplg), mRNA [NM_009151]
A_55_P2480722	1.74501	H2-L	Mus musculus histocompatibility 2, D region locus L (H2-L), mRNA [NM_001267808]
A_51_P391159	1.74493	Ang	Mus musculus angiogenin, ribonuclease, RNase A family, 5 (Ang), transcript variant 1, mRNA [NM_007447]
A_51_P431823	1.74123	Hmha1	Mus musculus histocompatibility (minor) HA-1 (Hmha1), transcript variant 2, mRNA [NM_027521]
A_55_P2916048	1.73683	Naglu	Mus musculus alpha-N-acetylglucosaminidase (Sanfilippo disease IIIB) (Naglu), mRNA [NM_013792]
A_55_P2830788	1.73633	Il10ra	Mus musculus interleukin 10 receptor, alpha (Il10ra), mRNA [NM_008348]
A_55_P1972772	1.73519	Gsg1	Mus musculus germ cell-specific gene 1 (Gsg1), transcript variant 3, mRNA [NM_010352]
A_52_P796840	1.73331	Cfhr2	Mus musculus complement factor H-related 2 (Cfhr2), mRNA [NM_001025575]
A_55_P2108837	1.73114	Tuba1c	Mus musculus tubulin, alpha 1C (Tuba1c), mRNA [NM_009448]
A_51_P184928	1.73055	Ifitm7	Mus musculus interferon induced transmembrane protein 7 (Ifitm7), mRNA [NM_001270718]
A_55_P2909739	1.72988	Tgfbr2	Mus musculus transforming growth factor, beta receptor II (Tgfbr2), transcript variant 1, mRNA [NM_009371]
A_66_P111521	1.72727	1700072B07Rik	Mus musculus RIKEN cDNA 1700072B07 gene (1700072B07Rik), long non-coding RNA [NR_040727]
A_55_P1962404	1.72677	Ugt1a6b	Mus musculus UDP glucuronosyltransferase 1 family, polypeptide A6B (Ugt1a6b), mRNA [NM_201410]
A_66_P135015	1.72649	Ifi35	Mus musculus interferon-induced protein 35 (Ifi35), mRNA [NM_027320]
A_51_P327796	1.72338	Itgb5	Mus musculus integrin beta 5 (Itgb5), transcript variant 2, mRNA [NM_010580]
A_51_P472249	1.71806	Slc7a7	Mus musculus solute carrier family 7 (cationic amino acid transporter, y+ system), member 7 (Slc7a7), transcript variant 1, mRNA [NM_011405]
A_55_P1962344	1.71719	Trim21	Mus musculus tripartite motif-containing 21 (Trim21), transcript variant 1, mRNA [NM_009277]
A_55_P2022211	1.71539	Plxdc2	Mus musculus plexin domain containing 2 (Plxdc2), mRNA [NM_026162]
A_55_P1971963	1.71504	Tmem176b	Mus musculus transmembrane protein 176B (Tmem176b), transcript variant 1, mRNA [NM_023056]
A_66_P100956	1.71433		Mus musculus adult male aorta and vein cDNA, RIKEN full-length enriched library, clone:A530087C19 product:unclassifiable, full insert sequence. [AK041167]
A_52_P21550	1.71274	Gcnt1	Mus musculus glucosaminyl (N-acetyl) transferase 1, core 2 (Gcnt1), transcript variant 1, mRNA [NM_173442]
A_55_P2182273	1.7105	Bin2	Mus musculus bridging integrator 2 (Bin2), mRNA [NM_001270537]
A_55_P2545303	1.70655	Gm32191	PREDICTED: Mus musculus predicted gene, 32191 (Gm32191), ncRNA [XR_861923]
A_55_P2417569	1.70633	Prrx2	Mus musculus paired related homeobox 2 (Prrx2), mRNA [NM_009116]
A_55_P1959305	1.70608	Rbm47	Mus musculus RNA binding motif protein 47 (Rbm47), transcript variant 1, mRNA [NM_178446]
A_52_P38639	1.70176	Fermt3	Mus musculus fermitin family homolog 3 (Drosophila) (Fermt3), mRNA [NM_153795]
A_66_P130629	1.70135	Mcm3	Mus musculus minichromosome maintenance deficient 3 (S. cerevisiae) (Mcm3), mRNA [NM_008563]
A_55_P2714075	1.70092	Tns3	tensin 3 [Source:MGI Symbol;Acc:MGI:2443012] [ENSMUST00000134823]
A_51_P251768	1.70087	Adgre1	Mus musculus adhesion G protein-coupled receptor E1 (Adgre1), mRNA [NM_010130]
A_51_P160673	1.69678	Kcne1l	Mus musculus potassium voltage-gated channel, Isk-related family, member 1-like, pseudogene (Kcne1l), mRNA [NM_021487]
A_55_P2051334	1.69435	H2-K2	Mus musculus histocompatibility 2, K region locus 2 (H2-K2), non-coding RNA [NR_004446]
A_55_P2745692	1.69404		immunoglobulin heavy constant mu [Source:MGI Symbol;Acc:MGI:96448] [ENSMUST00000177715]
A_51_P105986	1.69095	Syngr2	Mus musculus synaptogyrin 2 (Syngr2), mRNA [NM_009304]
A_51_P489887	1.69	Susd3	Mus musculus sushi domain containing 3 (Susd3), transcript variant 1, mRNA [NM_025491]
A_30_P01026381	1.68833		lincRNA:chr14:33975934-33998694 reverse strand
A_52_P51429	1.68829	Dennd1c	Mus musculus DENN/MADD domain containing 1C (Dennd1c), mRNA [NM_153551]
A_51_P414115	1.68746	Naprt	Mus musculus nicotinate phosphoribosyltransferase (Naprt), mRNA [NM_172607]
A_52_P591153	1.68696	Pld4	Mus musculus phospholipase D family, member 4 (Pld4), mRNA [NM_178911]
A_55_P1978506	1.68651	H2-Q8	Mus musculus histocompatibility 2, Q region locus 8 (H2-Q8), mRNA [NM_023124]
A_30_P01023171	1.68462		lincRNA:chr10:93819821-93976621 forward strand
A_51_P143190	1.67918	Lyl1	Mus musculus lymphoblastomic leukemia 1 (Lyl1), mRNA [NM_008535]
A_52_P98778	1.67667	Ang4	Mus musculus angiogenin, ribonuclease A family, member 4 (Ang4), mRNA [NM_177544]
A_51_P172231	1.67634	Gsdmd	Mus musculus gasdermin D (Gsdmd), mRNA [NM_026960]
A_55_P2637356	1.67128	Plce1	Mus musculus phospholipase C, epsilon 1 (Plce1), mRNA [NM_019588]
A_52_P271099	1.66997	Cyth4	Mus musculus cytohesin 4 (Cyth4), mRNA [NM_028195]
A_51_P246543	1.6698	Ebf3	Mus musculus early B cell factor 3 (Ebf3), transcript variant 3, mRNA [NM_010096]
A_52_P4538	1.66591	Tgfbr1	Mus musculus transforming growth factor, beta receptor I (Tgfbr1), mRNA [NM_009370]
A_66_P117187	1.66487	Eif2ak2	Mus musculus eukaryotic translation initiation factor 2-alpha kinase 2 (Eif2ak2), mRNA [NM_011163]
A_55_P2072373	1.66281	Msn	Mus musculus moesin (Msn), mRNA [NM_010833]
A_55_P2934712	1.65437	P2ry6	Mus musculus adult male small intestine cDNA, RIKEN full-length enriched library, clone:2010300K12 product:unclassifiable, full insert sequence. [AK008496]
A_51_P127367	1.65217	Irf9	Mus musculus interferon regulatory factor 9 (Irf9), transcript variant 3, mRNA [NM_008394]
A_30_P01017482	1.65074		lincRNA:chr6:4841700-4847400 reverse strand
A_52_P108401	1.65061	Tspear	Mus musculus thrombospondin type laminin G domain and EAR repeats (Tspear), mRNA [NM_001287074]
A_52_P354520	1.65008	Edem1	Mus musculus ER degradation enhancer, mannosidase alpha-like 1 (Edem1), mRNA [NM_138677]
A_55_P1974577	1.64828	Nfam1	Mus musculus Nfat activating molecule with ITAM motif 1 (Nfam1), transcript variant 1, mRNA [NM_001271411]
A_51_P165882	1.64814	Slc22a18	Mus musculus solute carrier family 22 (organic cation transporter), member 18 (Slc22a18), transcript variant 2, mRNA [NM_001042760]
A_52_P255782	1.64718	Slco2b1	Mus musculus solute carrier organic anion transporter family, member 2b1 (Slco2b1), transcript variant 2, mRNA [NM_175316]
A_52_P498193	1.64588	Aldh1l2	Mus musculus aldehyde dehydrogenase 1 family, member L2 (Aldh1l2), mRNA [NM_153543]
A_55_P1970810	1.64549	Agpat2	Mus musculus 1-acylglycerol-3-phosphate O-acyltransferase 2 (lysophosphatidic acid acyltransferase, beta) (Agpat2), mRNA [NM_026212]
A_52_P198435	1.64502	Rasgrp3	Mus musculus RAS, guanyl releasing protein 3 (Rasgrp3), transcript variant 2, mRNA [NM_207246]
A_55_P1978511	1.64263	H2-Q7	Mus musculus histocompatibility 2, Q region locus 7 (H2-Q7), transcript variant 1, mRNA [NM_010394]
A_55_P1981964	1.64147	Tnfrsf13b	tumor necrosis factor receptor superfamily, member 13b [Source:MGI Symbol;Acc:MGI:1889411] [ENSMUST00000010286]
A_51_P275976	1.64057	Dok1	Mus musculus docking protein 1 (Dok1), transcript variant 1, mRNA [NM_010070]
A_55_P2824451	1.63899	Fam167a	Mus musculus family with sequence similarity 167, member A (Fam167a), mRNA [NM_177628]
A_55_P2798063	1.63653	Parvg	Mus musculus parvin, gamma (Parvg), transcript variant 1, mRNA [NM_001162500]
A_51_P374900	1.63493	P2ry13	Mus musculus purinergic receptor P2Y, G-protein coupled 13 (P2ry13), mRNA [NM_028808]
A_51_P191463	1.63444	H2-M2	PREDICTED: Mus musculus histocompatibility 2, M region locus 2 (H2-M2), transcript variant X2, mRNA [XM_006525458]
A_52_P515247	1.6319	Arhgdib	Mus musculus Rho, GDP dissociation inhibitor (GDI) beta (Arhgdib), transcript variant 1, mRNA [NM_007486]
A_55_P2501876	1.6248	H2-L	Mus musculus histocompatibility 2, D region locus L (H2-L), mRNA [NM_001267808]
A_55_P2786523	1.62439	Ppp1r18	Mus musculus protein phosphatase 1, regulatory subunit 18 (Ppp1r18), transcript variant 1, mRNA [NM_175242]
A_51_P347961	1.62306	Npc2	Mus musculus Niemann-Pick type C2 (Npc2), mRNA [NM_023409]
A_51_P327121	1.62128	Was	Mus musculus Wiskott-Aldrich syndrome homolog (human) (Was), mRNA [NM_009515]
A_55_P2842483	1.61993	Plau	Mus musculus plasminogen activator, urokinase (Plau), mRNA [NM_008873]
A_55_P2115136	1.61233	4632428N05Rik	Mus musculus RIKEN cDNA 4632428N05 gene (4632428N05Rik), transcript variant 1, mRNA [NM_028732]
A_55_P2796497	1.60648	Pyroxd2	Mus musculus pyridine nucleotide-disulphide oxidoreductase domain 2 (Pyroxd2), mRNA [NM_029011]
A_55_P2040371	1.60524	Rnaset2a	Mus musculus ribonuclease T2A (Rnaset2a), mRNA [NM_001083938]
A_51_P377833	1.60448	Cmtm7	Mus musculus CKLF-like MARVEL transmembrane domain containing 7 (Cmtm7), transcript variant 1, mRNA [NM_133978]
A_55_P2499523	1.60446	Mcm3	Mus musculus minichromosome maintenance deficient 3 (S. cerevisiae) (Mcm3), mRNA [NM_008563]
A_52_P309381	1.60436	Cfh	Mus musculus complement component factor h (Cfh), mRNA [NM_009888]
A_51_P324934	1.59977	Mcm3	Mus musculus 2 days neonate thymus thymic cells cDNA, RIKEN full-length enriched library, clone:E430004P22 product:mini chromosome maintenance deficient (S. cerevisiae), full insert sequence. [AK088142]
A_51_P336161	1.59963	Man2b1	Mus musculus mannosidase 2, alpha B1 (Man2b1), mRNA [NM_010764]
A_52_P618569	1.59506	Ikzf1	Mus musculus IKAROS family zinc finger 1 (Ikzf1), transcript variant 1, mRNA [NM_001025597]
A_55_P2049647	1.5908	H2-K1	Mus musculus histocompatibility 2, K1, K region (H2-K1), transcript variant 1, mRNA [NM_001001892]
A_55_P2753460	1.58952	Il21r	Mus musculus interleukin 21 receptor (Il21r), mRNA [NM_021887]
A_55_P2806002	1.58793	Il13ra1	Mus musculus interleukin 13 receptor, alpha 1 (Il13ra1), mRNA [NM_133990]
A_55_P2809820	1.58422	Lpcat2	Mus musculus lysophosphatidylcholine acyltransferase 2 (Lpcat2), mRNA [NM_173014]
A_30_P01020902	1.58399		lincRNA:chr10:93774693-93893616 forward strand
A_55_P2177712	1.58338	LOC102638515	PREDICTED: Mus musculus uncharacterized LOC102638515 (LOC102638515), transcript variant X1, mRNA [XM_011251820]
A_66_P117149	1.58086	Tcirg1	Mus musculus T cell, immune regulator 1, ATPase, H+ transporting, lysosomal V0 protein A3 (Tcirg1), transcript variant 3, mRNA [NM_001167784]
A_51_P456657	1.57962	Tgif2	Mus musculus TGFB-induced factor homeobox 2 (Tgif2), transcript variant 1, mRNA [NM_173396]
A_55_P2088425	1.57843	Tcn2	Mus musculus transcobalamin 2 (Tcn2), transcript variant 1, mRNA [NM_015749]
A_51_P282667	1.57602	Hexa	Mus musculus hexosaminidase A (Hexa), mRNA [NM_010421]
A_51_P408506	1.56901	Icam1	Mus musculus intercellular adhesion molecule 1, mRNA (cDNA clone MGC:6195 IMAGE:3588949), complete cds. [BC008626]
A_51_P393748	1.56858	Ddx58	Mus musculus DEAD (Asp-Glu-Ala-Asp) box polypeptide 58 (Ddx58), mRNA [NM_172689]
A_55_P1971962	1.5671	Tmem176b	Mus musculus transmembrane protein 176B (Tmem176b), transcript variant 1, mRNA [NM_023056]
A_66_P134786	1.55848	LOC102638515	PREDICTED: Mus musculus uncharacterized LOC102638515 (LOC102638515), transcript variant X2, mRNA [XM_006500545]
A_55_P2123496	1.55622	Jam2	Mus musculus 9.5 days embryo parthenogenote cDNA, RIKEN full-length enriched library, clone:B130032E13 product:junction cell adhesion molecule 2, full insert sequence. [AK045095]
A_52_P424840	1.55399	Mrc2	Mus musculus mannose receptor, C type 2 (Mrc2), mRNA [NM_008626]
A_55_P2154208	1.55062	Zc3hav1	PREDICTED: Mus musculus zinc finger CCCH type, antiviral 1 (Zc3hav1), transcript variant X1, mRNA [XM_006506779]
A_55_P2130970	1.55018	Parp10	Mus musculus poly (ADP-ribose) polymerase family, member 10 (Parp10), transcript variant 2, mRNA [NM_001163576]
A_55_P2106235	1.55001	Syngr2	Mus musculus synaptogyrin 2 (Syngr2), mRNA [NM_009304]
A_55_P2519295	1.54929	Dera	Mus musculus adult male diencephalon cDNA, RIKEN full-length enriched library, clone:9330181A19 product:hypothetical Deoxyribose-phosphate aldolase containing protein, full insert sequence. [AK034347]
A_55_P1979330	1.54352	Dapp1	Mus musculus dual adaptor for phosphotyrosine and 3-phosphoinositides 1 (Dapp1), mRNA [NM_011932]
A_55_P2757433	1.54139	Hmox1	Mus musculus heme oxygenase 1 (Hmox1), mRNA [NM_010442]
A_55_P2498142	1.53655	Irgm1	Mus musculus immunity-related GTPase family M member 1 (Irgm1), mRNA [NM_008326]
A_52_P35534	1.53519	E230029C05Rik	Mus musculus RIKEN cDNA E230029C05 gene (E230029C05Rik), transcript variant 1, long non-coding RNA [NR_110364]
A_51_P241861	1.53459	Tcirg1	Mus musculus T cell, immune regulator 1, ATPase, H+ transporting, lysosomal V0 protein A3 (Tcirg1), transcript variant 1, mRNA [NM_016921]
A_51_P362066	1.53174	Chil1	Mus musculus chitinase-like 1 (Chil1), mRNA [NM_007695]
A_65_P09765	1.53068	Stat1	Mus musculus adult male spinal cord cDNA, RIKEN full-length enriched library, clone:A330045H06 product:signal transducer and activator of transcription 1, full insert sequence. [AK039458]
A_55_P2500178	1.52865	Clic1	Mus musculus chloride intracellular channel 1 (Clic1), mRNA [NM_033444]
A_51_P321886	1.5272	Cmtm3	Mus musculus CKLF-like MARVEL transmembrane domain containing 3 (Cmtm3), mRNA [NM_024217]
A_51_P504337	1.52271	Entpd1	Mus musculus ectonucleoside triphosphate diphosphohydrolase 1 (Entpd1), transcript variant 2, mRNA [NM_009848]
A_55_P2079860	1.51968	Asap3	Mus musculus ArfGAP with SH3 domain, ankyrin repeat and PH domain 3 (Asap3), mRNA [NM_001008232]
A_51_P165602	1.51713	Lbx2	Mus musculus ladybird homeobox homolog 2 (Drosophila) (Lbx2), mRNA [NM_010692]
A_51_P240801	1.51445	Tmem173	Mus musculus transmembrane protein 173 (Tmem173), transcript variant 1, mRNA [NM_028261]
A_51_P118443	1.51411	Ppp1r18	Mus musculus protein phosphatase 1, regulatory subunit 18 (Ppp1r18), transcript variant 1, mRNA [NM_175242]
A_55_P2000224	1.51209	Cd63	Mus musculus CD63 antigen (Cd63), transcript variant 3, mRNA [NM_001282966]
A_55_P2801083	1.50965	Pros1	Mus musculus protein S (alpha) (Pros1), mRNA [NM_011173]
A_55_P2803946	1.50901	Itpripl2	Mus musculus inositol 1,4,5-triphosphate receptor interacting protein-like 2 (Itpripl2), mRNA [NM_001033380]
A_66_P109152	1.50544	Lacc1	laccase (multicopper oxidoreductase) domain containing 1 [Source:MGI Symbol;Acc:MGI:2445077] [ENSMUST00000139809]
A_51_P207031	1.50543	Ncf1	Mus musculus neutrophil cytosolic factor 1 (Ncf1), transcript variant 2, mRNA [NM_010876]
A_52_P625527	1.50107	Aqp4	Mus musculus aquaporin 4 (Aqp4), mRNA [NM_009700]
A_55_P2805433	-1.51588	F2rl2	Mus musculus coagulation factor II (thrombin) receptor-like 2 (F2rl2), mRNA [NM_010170]
A_55_P2159480	-1.52991	Fam160a1	Mus musculus family with sequence similarity 160, member A1 (Fam160a1), mRNA [NM_172682]
A_55_P1987146	-1.54039	Adgrf4	Mus musculus adhesion G protein-coupled receptor F4 (Adgrf4), transcript variant 1, mRNA [NM_030067]
A_30_P01031079	-1.54126		lincRNA:chr14:73746324-73749119 reverse strand
A_55_P1997525	-1.54601	Arpp21	Mus musculus cyclic AMP-regulated phosphoprotein, 21 (Arpp21), transcript variant 5, mRNA [NM_001177617]
A_52_P38208	-1.55601	Arpp21	Mus musculus cyclic AMP-regulated phosphoprotein, 21 (Arpp21), transcript variant 1, mRNA [NM_028755]
A_51_P357013	-1.58489	Tpm2	Mus musculus tropomyosin 2, beta (Tpm2), transcript variant Tpm2.2, mRNA [NM_009416]
A_51_P205820	-1.61443	Klf11	Mus musculus Kruppel-like factor 11 (Klf11), mRNA [NM_178357]
A_55_P2016937	-1.67194	Arpp21	Mus musculus cyclic AMP-regulated phosphoprotein, 21 (Arpp21), transcript variant 6, mRNA [NM_001177619]
A_55_P1990870	-1.69508	Mylk3	myosin light chain kinase 3 [Source:MGI Symbol;Acc:MGI:2443063] [ENSMUST00000034133]
A_52_P803124	-1.69545	AU023762	Mus musculus expressed sequence AU023762 (AU023762), long non-coding RNA [NR_040760]
A_55_P1981366	-1.69795	Lamc2	Mus musculus laminin, gamma 2 (Lamc2), mRNA [NM_008485]
A_51_P225134	-1.73525	Myh2	Mus musculus myosin, heavy polypeptide 2, skeletal muscle, adult (Myh2), mRNA [NM_001039545]
A_52_P309563	-1.73725	Ulk4	Mus musculus unc-51-like kinase 4 (Ulk4), mRNA [NM_177589]
A_55_P2143693	-1.73961	Sytl1	Mus musculus synaptotagmin-like 1 (Sytl1), mRNA [NM_031393]
A_52_P365925	-1.74086		predicted gene 7731 [Source:MGI Symbol;Acc:MGI:3644153] [ENSMUST00000091759]
A_55_P1956495	-1.78901	Gm6980	Mus musculus 0 day neonate lung cDNA, RIKEN full-length enriched library, clone:E030013G21 product:unclassifiable, full insert sequence. [AK086943]
A_66_P105524	-1.80225	LOC102635707	PREDICTED: Mus musculus uncharacterized LOC102635707 (LOC102635707), transcript variant X4, mRNA [XM_006543660]
A_55_P1986421	-1.80232	Tcp11	Mus musculus t-complex protein 11 (Tcp11), transcript variant 1, mRNA [NM_013687]
A_66_P113243	-1.81533	Mylk3	Mus musculus myosin light chain kinase 3 (Mylk3), transcript variant 1, mRNA [NM_175441]
A_66_P122151	-1.84301	Etnppl	Mus musculus ethanolamine phosphate phospholyase (Etnppl), transcript variant 1, mRNA [NM_027907]
A_55_P2043237	-1.8434	Rpe65	Mus musculus retinal pigment epithelium 65 (Rpe65), mRNA [NM_029987]
A_55_P2795189	-1.84978	A330076C08Rik	Mus musculus RIKEN cDNA A330076C08 gene (A330076C08Rik), long non-coding RNA [NR_045088]
A_55_P2001078	-1.91649	Mmel1	Mus musculus membrane metallo-endopeptidase-like 1 (Mmel1), mRNA [NM_013783]
A_51_P260288	-1.92779	Cpne4	Mus musculus adult male testis cDNA, RIKEN full-length enriched library, clone:4933406O10 product:RIKEN cDNA 4933406O10 gene, full insert sequence. [AK016705]
A_51_P262325	-1.97281	Nek11	Mus musculus NIMA (never in mitosis gene a)-related expressed kinase 11 (Nek11), mRNA [NM_172461]
A_51_P520639	-2.00589	Mslnl	Mus musculus mesothelin-like (Mslnl), mRNA [NM_177822]
A_51_P217517	-2.01139	Mmel1	Mus musculus membrane metallo-endopeptidase-like 1 (Mmel1), mRNA [NM_013783]
A_66_P116294	-2.06178	Gm765	Mus musculus predicted gene 765 (Gm765), mRNA [NM_001128092]
A_55_P2083121	-2.23283	Vill	Mus musculus villin-like (Vill), transcript variant 1, mRNA [NM_001164567]
A_51_P408172	-2.25221	Col6a4	Mus musculus collagen, type VI, alpha 4 (Col6a4), mRNA [NM_026763]
A_51_P313320	-2.36728	Cd6	Mus musculus CD6 antigen (Cd6), transcript variant 1, mRNA [NM_001037801]
A_55_P2717762	-2.53016	Gm5148	predicted gene 5148 [Source:MGI Symbol;Acc:MGI:3646006] [ENSMUST00000134904]
